# Supplementary material
Source: MDPI journal article supplement (https://www.mdpi.com/2297-8747/23/2/24)
Supplement: s1 [file s1]

Video description: Animation of Fig. 7 in the manuscript

H. Moldenhauer

Integration of Direction Fields with Standard Options in Finite Element Programs

Producing Figure 7 needs execution of the following steps:

- 1) Static run      Input: "Figure7-Static.inp" (reads "Figure7-BulkData.inp")  
Run the Abaqus Input "Figure7-Static.inp"  
Result: odb-File, which can be viewed with Abaqus/View  
A viewer option is: Report -> Field Output.  
With this option write the stress components Sxx, Syy, Sxy.  
Edit this file: add commas to separate the stress components.  
The result should look like the file "Figure7-Static.rpt"
- 2) Figure7.for    Fortran program, which reads "Figure7-Static.rpt"  
Input: Figure7-Static.rpt  
Output: Figure7-Static.out. This File contains local inclination angles with  
respect to the global x-axis, one line per element.  
These local directions are used for the orthotropic thermal analysis.
- 3) Thermal run    Input: "Figure7d.inp" (reads "Figure7-BulkData.inp" and "Figure7-Static.out")  
Run the Abaqus Input "Figure7d.inp" ( $k_1/k_2 = 4096$ )  
Result: odb-File, which can be viewed with Abaqus/View  
and looks like Figure7d in the paper.
- 4) Animation      Input: "Figure7.inp" (reads "Figure7-BulkData.inp" and "Figure7-Static.out")  
Run the Abaqus Input "Figure7.inp" ( $k_1/k_2 = 1, 2, 4, \dots, 4096$ )  
Result: odb-File, which can be viewed and animated with Abaqus/View.
- Remark            Step 1 and 2 is optional. You can immediately start with step 3, as the file  
for the local conductivity systems is in the zip-archiv ("Figure7-Static.out").
